# Supplementary material for: Adventitial Sca1+ Cells Transduced With ETV2 Are Committed to the Endothelial Fate and Improve Vascular Remodeling After Injury
Source: PubMed Central journal article supplement — Arterioscler Thromb Vasc Biol. 2017 Dec 27;38(1):232–44. doi: 10.1161/ATVBAHA.117.309853 (PMC5757665; doi:10.1161/atvbaha.117.309853), 2017-12-27
Supplement: atv-38-232-s001.pdf [file atv-38-232-s001.pdf]

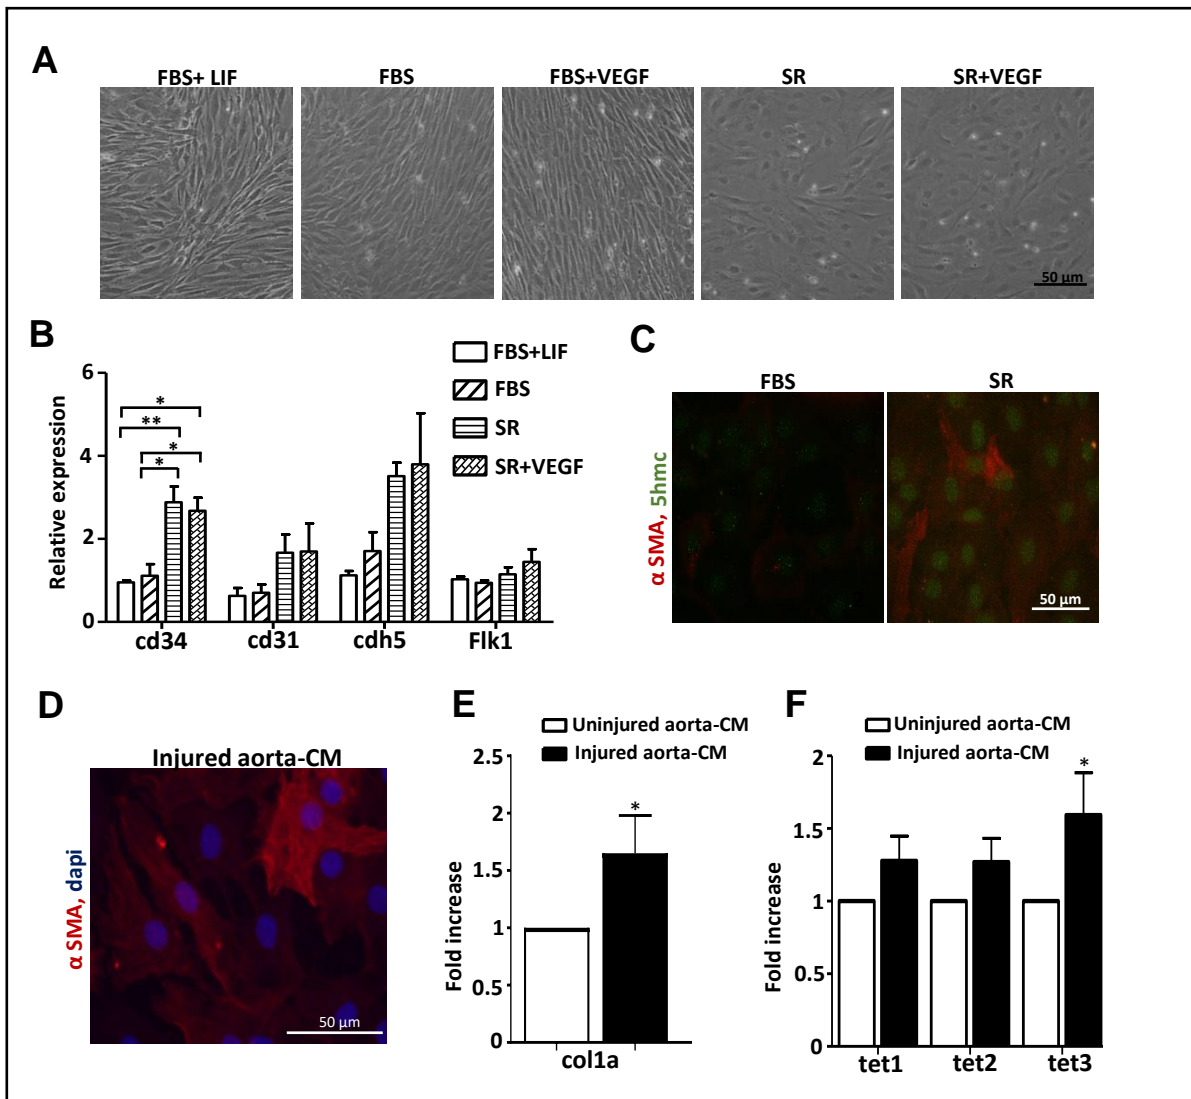

**Figure I.** AdvSca1 cells differentiate into SMC/mesenchymal cells and undergo epigenetic changes *in vitro* and *ex vivo* in response to vascular injury. **A**, Morphology of AdvSca1 cells cultured for 3 days in stem cell medium supplemented with FBS+LIF, FBS, FBS+VEGF, or differentiation medium SR, or SR+VEGF. No typical EC cobblestone morphology was observed in any conditions. **B**, Quantitative RT PCR analysis of EC genes expression in AdvSca1 cells cultured in different conditions (experiment performed in triplicate, \* $p < 0.05$ , \*\* $p < 0.01$ , data representative of 2 independent experiments). **C**, Immunofluorescence staining of AdvSca1 cells cultured in FBS or SR for  $\alpha$ SMA (red) or 5hmc (green) showed the correlation between increased DNA hydroxymethylation and SMC/mesenchymal differentiation. Mouse AdvSca1 cells were cultured for 5 days in presence of conditioned media (CM) from uninjured or injured sections of the same rat artery **D**, Higher magnification of immunofluorescence staining for  $\alpha$ SMA (red) of AdvSca1 cells treated with injured aorta CM shows the stress fiber organization. Quantitative RT PCR shows increase in **(E)** col1a expression and **(F)** Tet3 expression ( $n=9$  arteries, \* $p < 0.05$  versus non injured aorta-CM).

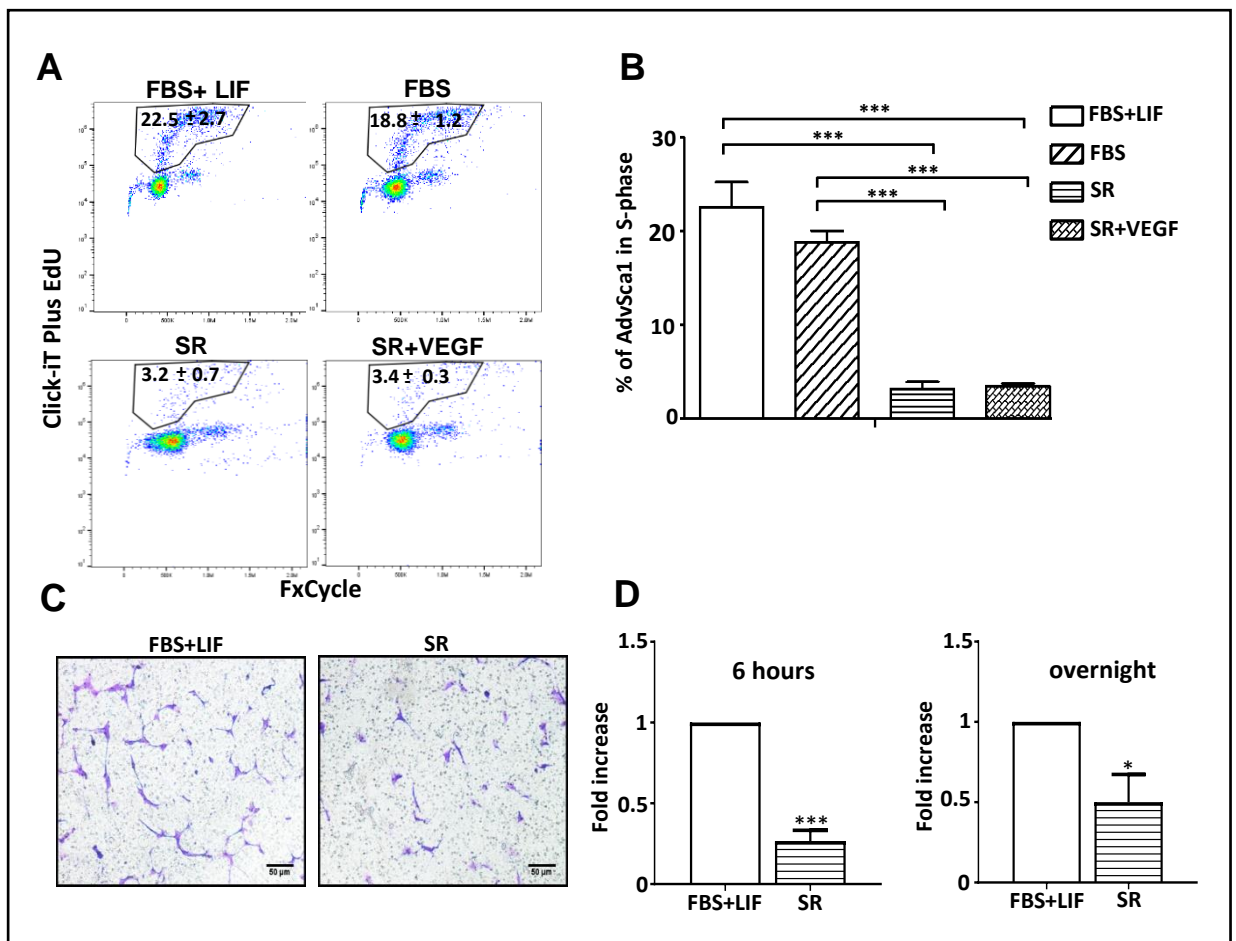

**Figure II.** AdvSca1 cells cultured in different conditions show changes in their proliferation and migration properties. **A**, Representative pictures of flow cytometry analysis for Edu and cell cycle distribution of AdvSca1 cells cultured for 3 days in FBS+LIF, FBS, SR and SR+VEGF. **B**, Percentage of AdvSca1 cells in S-phase for the different groups (\*\* $p < 0.001$ ,  $n = 3$ , data representative of 2 independent experiments). AdvSca1 cells were cultured for 5 days in FBS+LIF or SR and then assessed for migration ability by transwell assay **C**, x10 magnification images of the transwell inserts of the overnight migrated AdvSca1. **D**, Quantification of transwell migration assay after 6h and overnight. 5 fields at x10 magnification of each insert for each condition were considered for quantification of cell migration (\* $p < 0.05$ , \*\* $p < 0.001$   $n = 3$ ).

# Gene Ontology Analysis

## Adv NULL vs AdvSca1

### Up-regulated Genes Biological Process

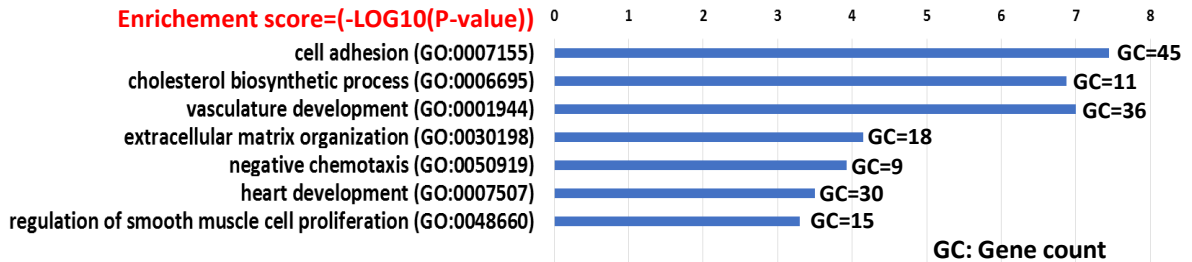

### Down-regulated Genes Biological Process

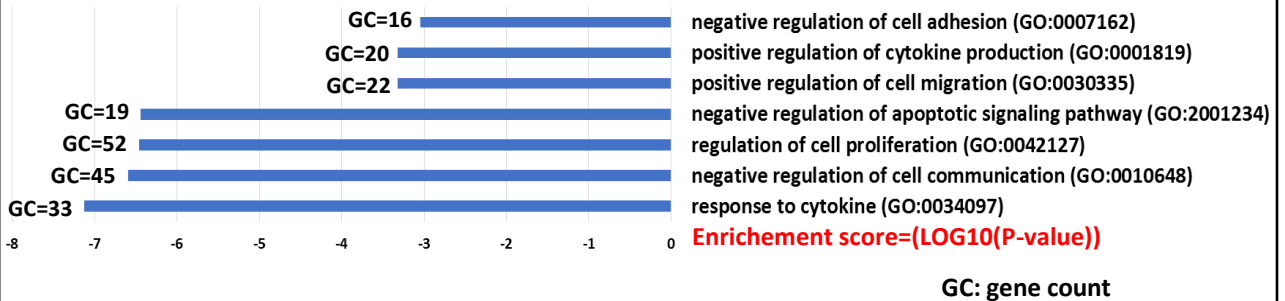

**Figure III:** Gene ontology analysis of the differentially regulated genes between Adv\_NULL and Adv\_Sca1. Gene ontology analysis was performed on the upregulated and downregulated genes of Adv\_NULL compared to Adv\_Sca1. Enrichment in gene ontology of biological processes are revealed. Significance of enrichment was evaluated by p-value.

# Gene Ontology Analysis

## Adv ETV2 vs Adv NULL

### Up-regulated Genes Biological Process

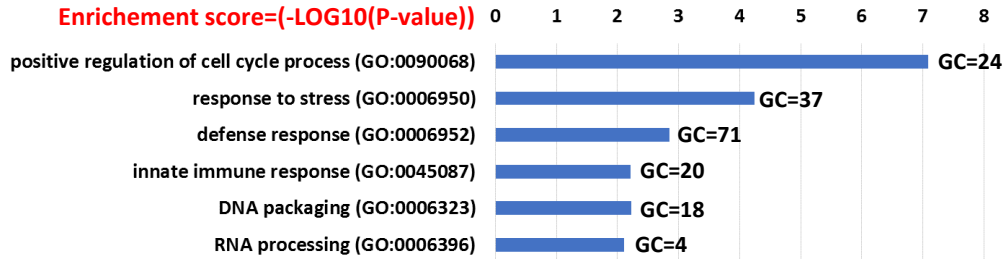

### Down-regulated Genes Biological Process

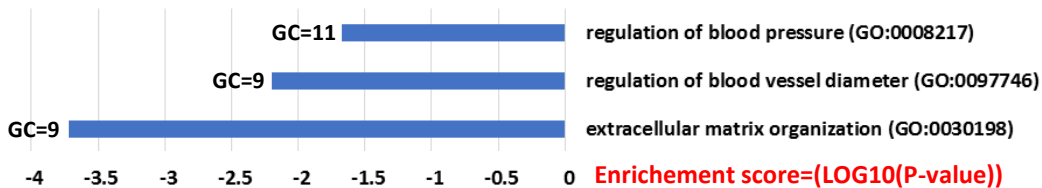

**Figure IV.** Gene ontology analysis of the differentially regulated genes between Adv\_ETV2 and Adv\_NULL. Gene ontology analysis was performed on the upregulated and downregulated genes of Adv\_ETV2 compared to Adv\_NULL. Enrichment in gene ontology of biological processes are revealed. Significance of enrichment was evaluated by p-value.

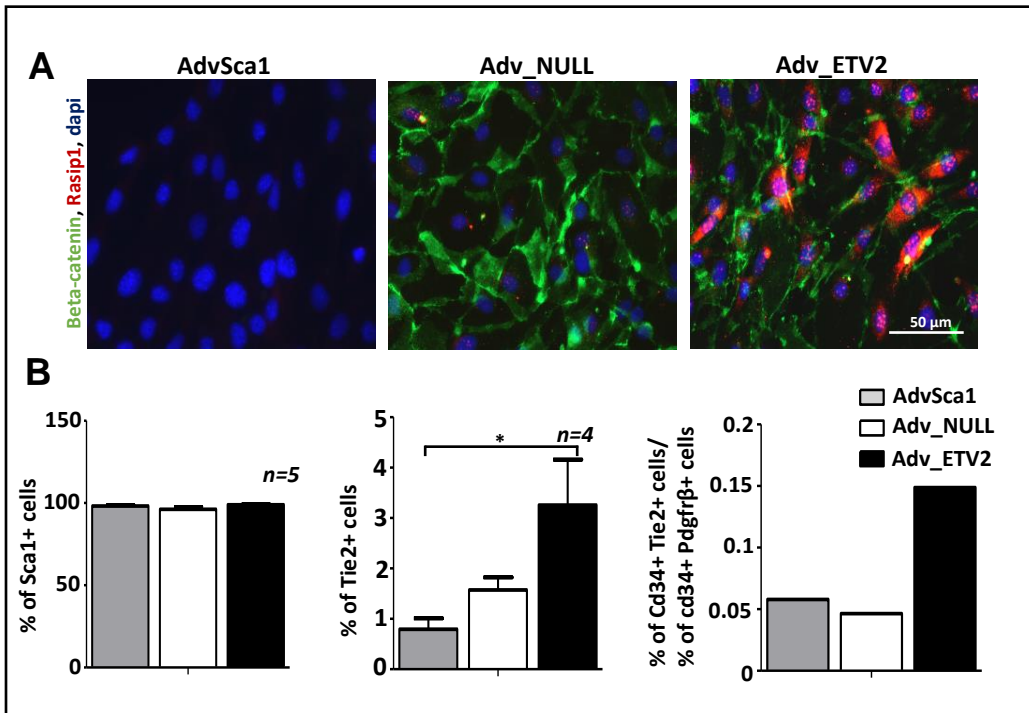

**Figure V.** Phenotypic characterization of AdvSca1, Adv\_NULL and Adv\_ETV2 cells. **A**, Immunofluorescence staining of AdvSca1, Adv\_NULL and Adv\_ETV2 cells for Rasip1 (red) and beta-catenin (green). **B**, Quantification of the percentage of Sca1+ cells, Tie2+ cells and measurement of the cd34+Tie2+/cd34+Pdgfrβ+ ratio in AdvSca1, Adv\_NULL and Adv\_ETV2 cells (\* $p < 0.05$ ,  $n = 4-5$  independent experiments).

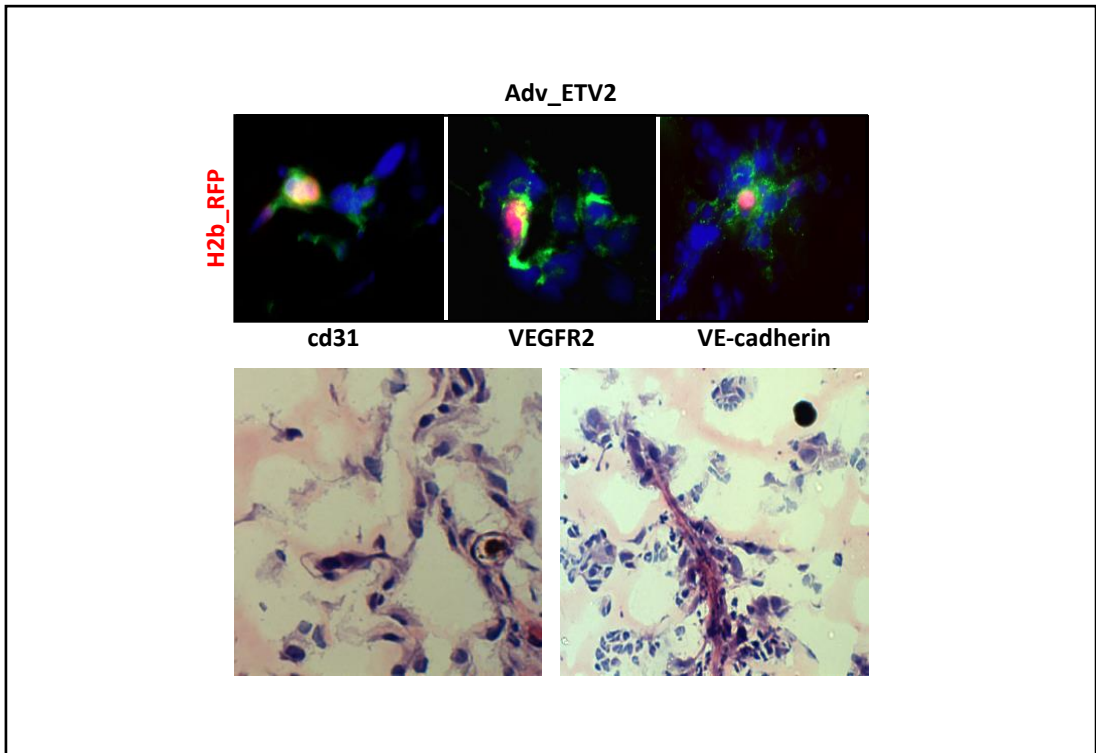

**Figure VI.** Adv\_ETV2 cells express EC markers *in vivo* and form functional vascular networks in a subcutaneous matrigel plug assay. **(Top)** Immunofluorescence staining for cd31, VEGFR2, and VE-cadherin, of matrigel plugs sections where Adv\_ETV2 cells stably expressing nuclear RFP were seeded. **(Bottom)** Sections of matrigel plugs seeded with Adv\_ETV2 cells and stained for Hematoxylin and eosin staining showed the presence of blood cells in the newly formed vessels.

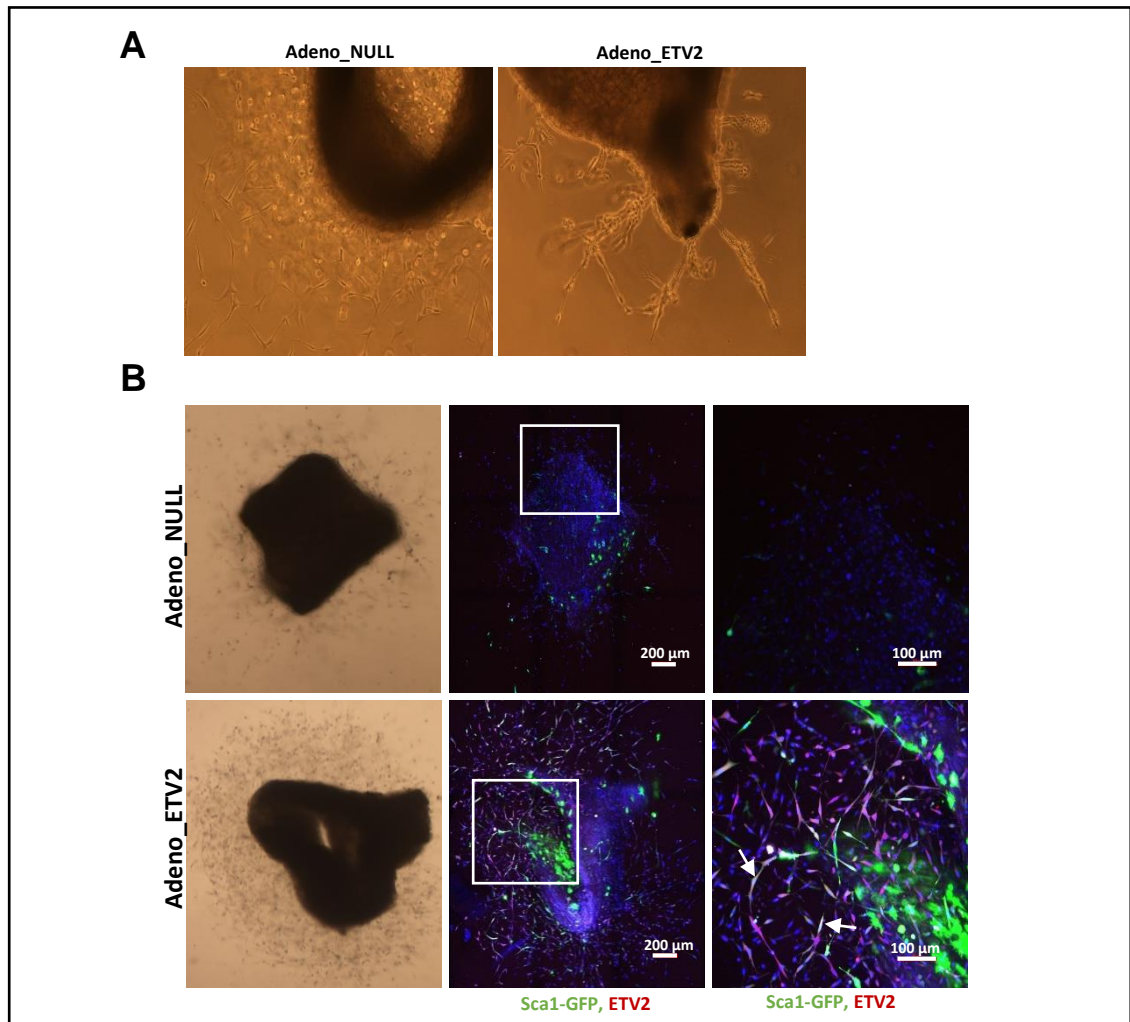

**Figure VII.** *Ex vivo* adenoviral delivery of ETV2 in Sca1+ cells of aortic ring explants increases vascular sprouting. Aortic rings from Sca1-GFP mice were cultured for 7 days in presence of control NULL or ETV2 overexpressing adenovirus. **A**, Higher magnification pictures of the aortic rings explants allows the visualization of the vascular sprouts. **B**, Both groups of rings were stained by immunofluorescence for ETV2 (red). GFP+ cells (Sca1+) (white arrows) can be seen expressing ETV2 in the rings treated with ETV2 adenovirus and included in the vascular sprouts.

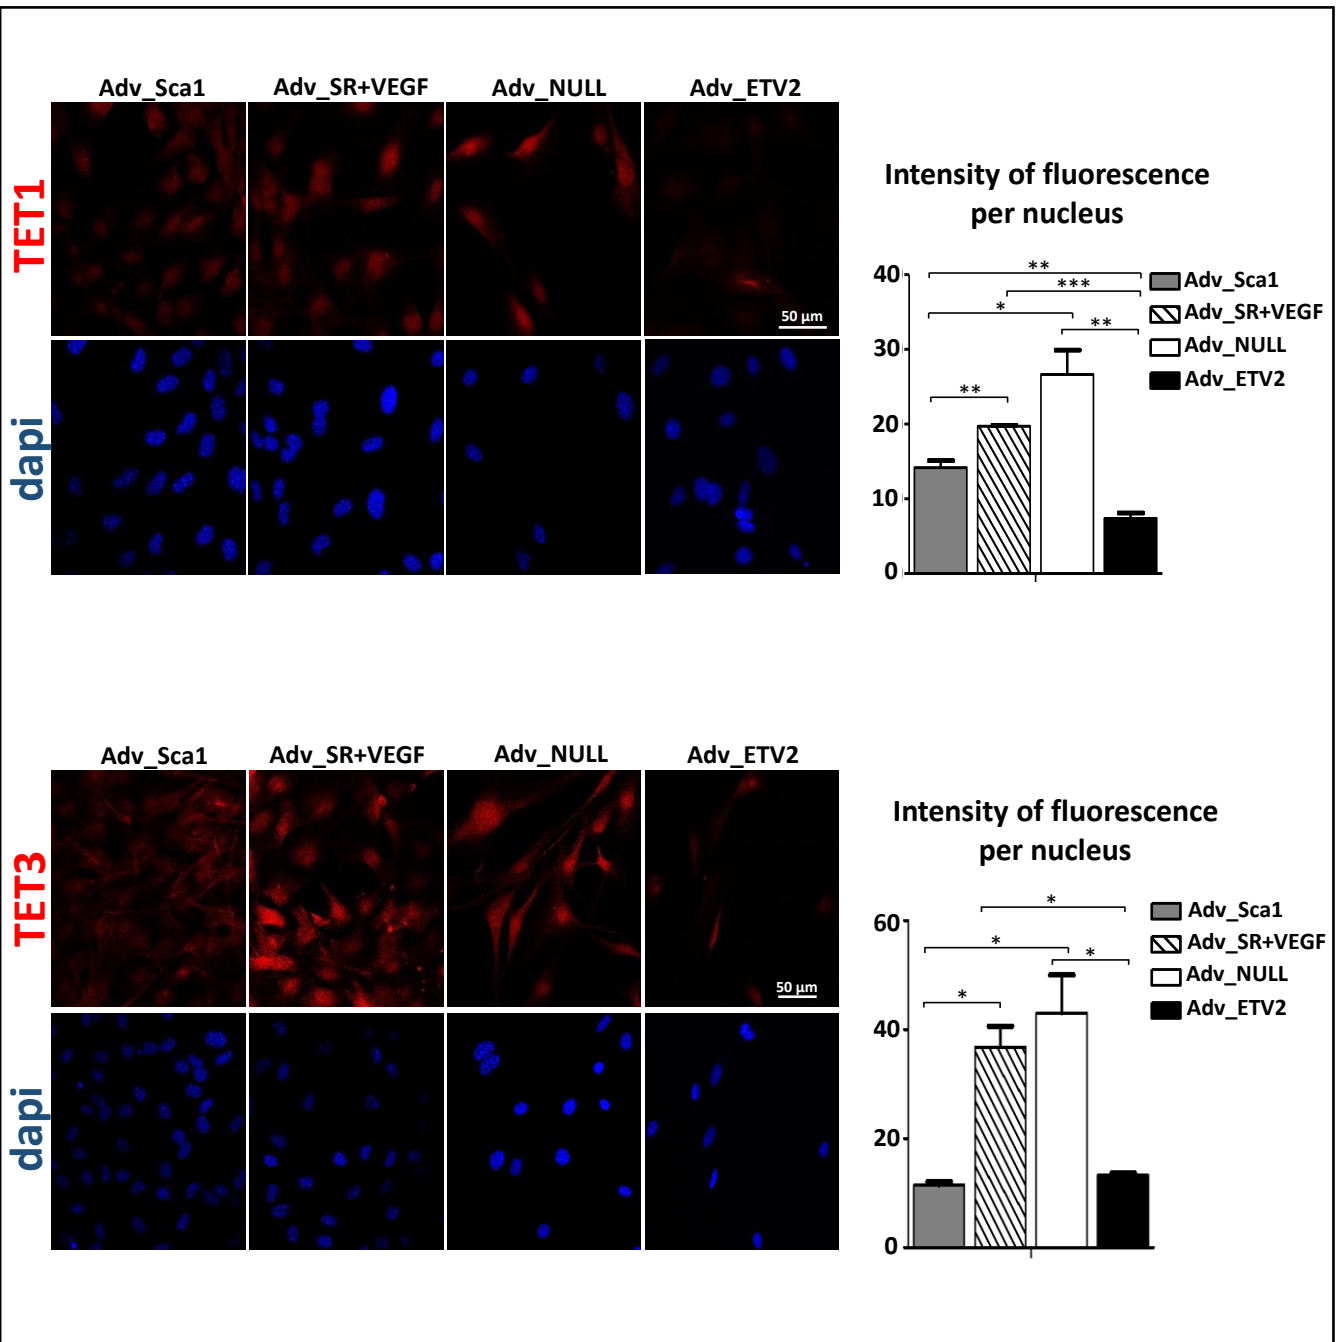

**Figure VIII.** Tet methylcytosine dioxygenases are differentially expressed in AdvSca1 cultured in FBS+LIF (AdvSca1) or SR+VEGF (Adv\_SR+VEGF), Adv\_NULL and Adv\_ETV2 cells. Immunofluorescence staining for TET1 and TET3 (red). DAPI stains nuclei blue and quantification of intensity of fluorescence per nucleus and per x40 magnification field, n=3 magnification fields (\*p < 0.05, \*\*p < 0.01, \*\*\*p < 0.001)



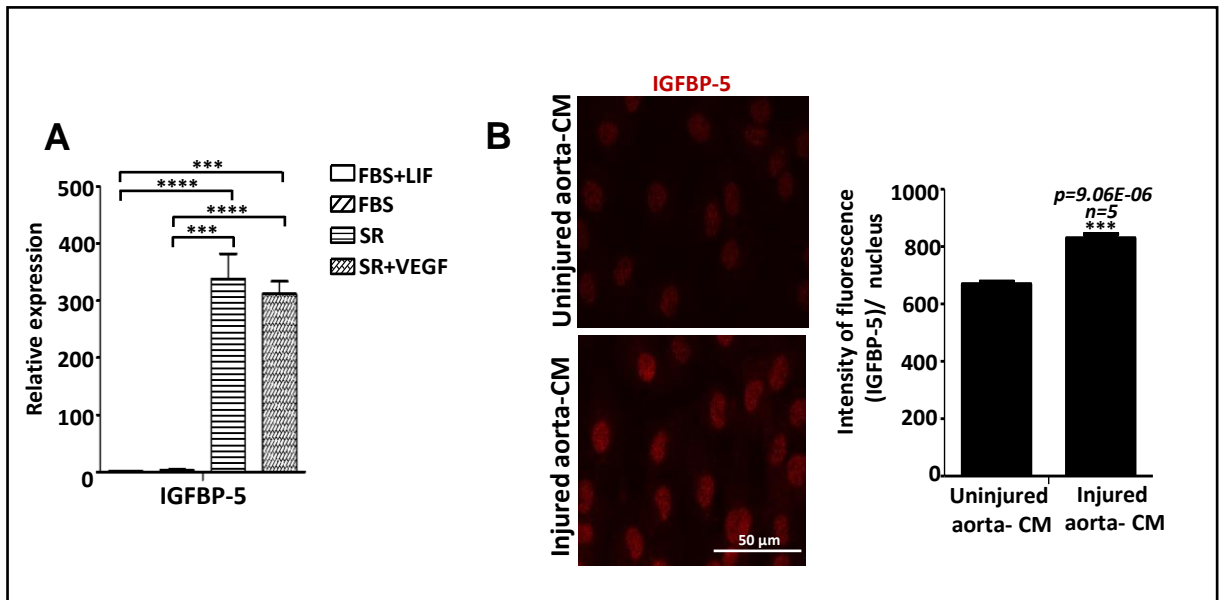

**Figure IX.** IGFBP-5 is involved in SMC differentiation of AdvSca1 cells. **A**, Quantitative RT PCR analysis of IGFBP-5 expression in AdvSca1 cells after culture in different conditions (Experiment performed in triplicate,  $***p < 0.001$ ,  $****p < 0.0001$ , data representative of 2 independent experiments). **B**, Immunofluorescence staining for IGFBP-5 (red), of AdvSca1 cells cultured for 5 days in CM from uninjured or injured rat artery. Intensity of fluorescence per nucleus and per x40 magnification field,  $n=5$  magnification fields,  $***p < 0.001$  versus uninjured aorta-CM. The histogram is representative of results obtained from 3 different arteries.

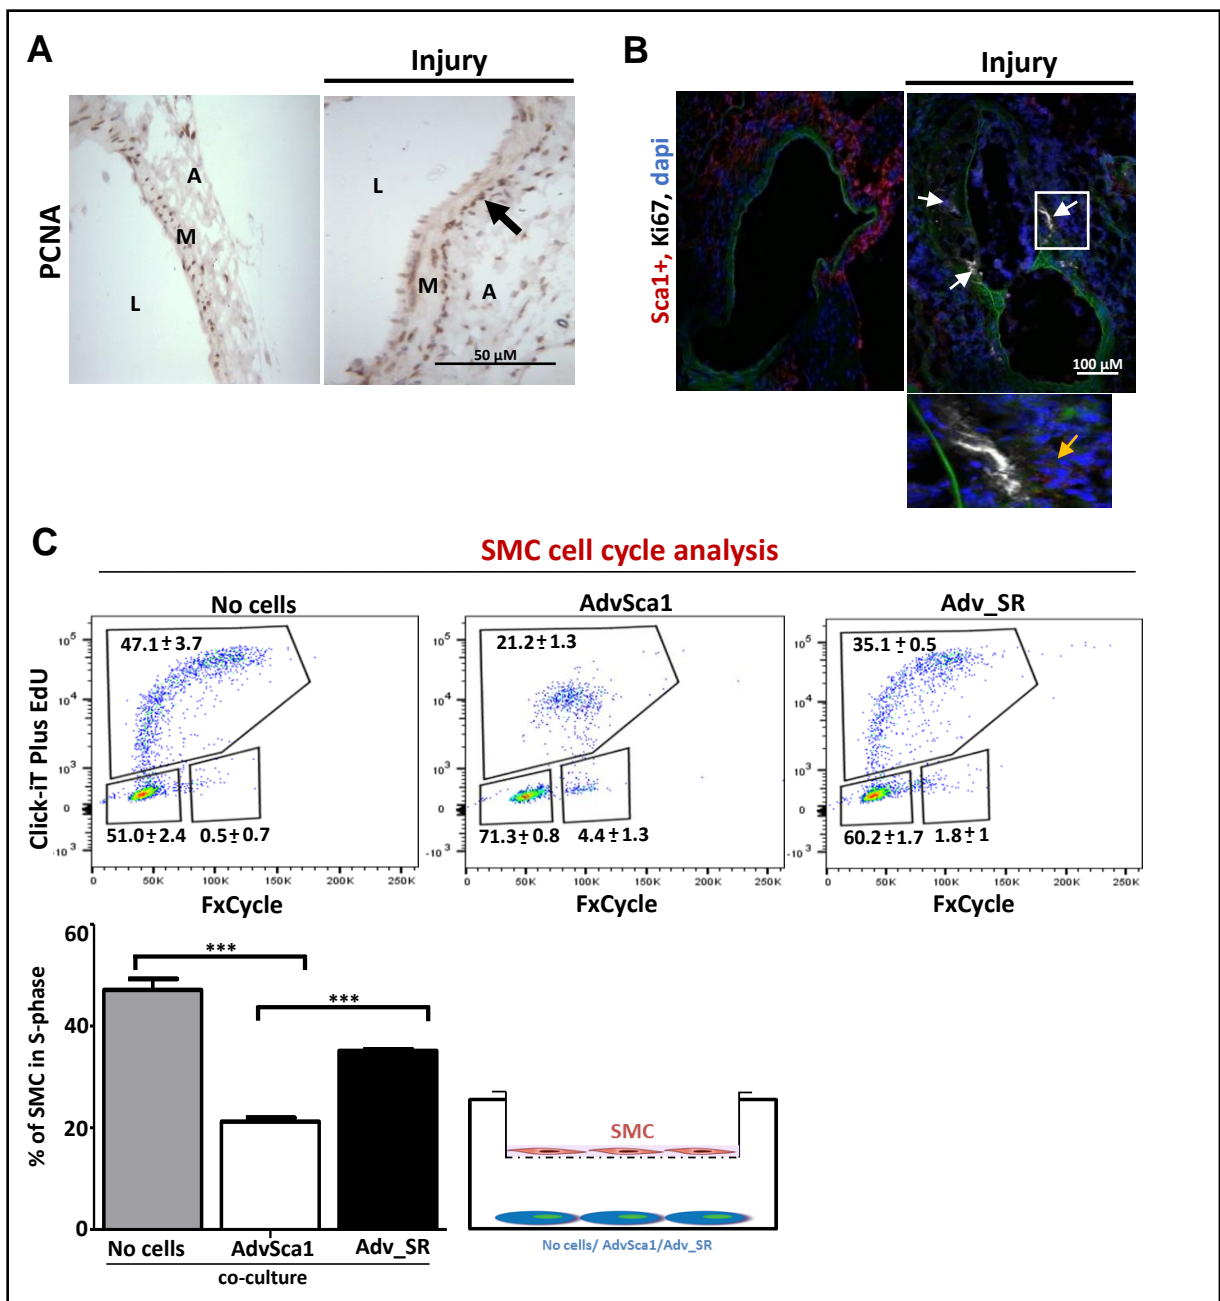

**Figure X.** AdvSca1 cells modulate SMC proliferation. **A**, Immunohistochemistry using PCNA antibody on sections from uninjured and 2 weeks post injury femoral arteries. **B**, Immunofluorescence staining using Sca1 (in red) and ki67 (in white) antibodies on sections from uninjured and 1 week post-injury femoral arteries. White arrows indicate ki67+ cells in the media and at the border media/ adventitia. The yellow arrow in the inset indicates Sca1+ cells. The internal elastic lamina can be seen by autofluorescence (green channel). **C**, SMC were cultured for 48 hours alone or in co-culture with undifferentiated AdvSca1 or cells differentiated in SR for 3 days (Adv\_SR). SMC were analyzed for Edu and cell cycle distribution by flow cytometry (\*\*p < 0.001, n = 3, data representative of 2 independent experiments).

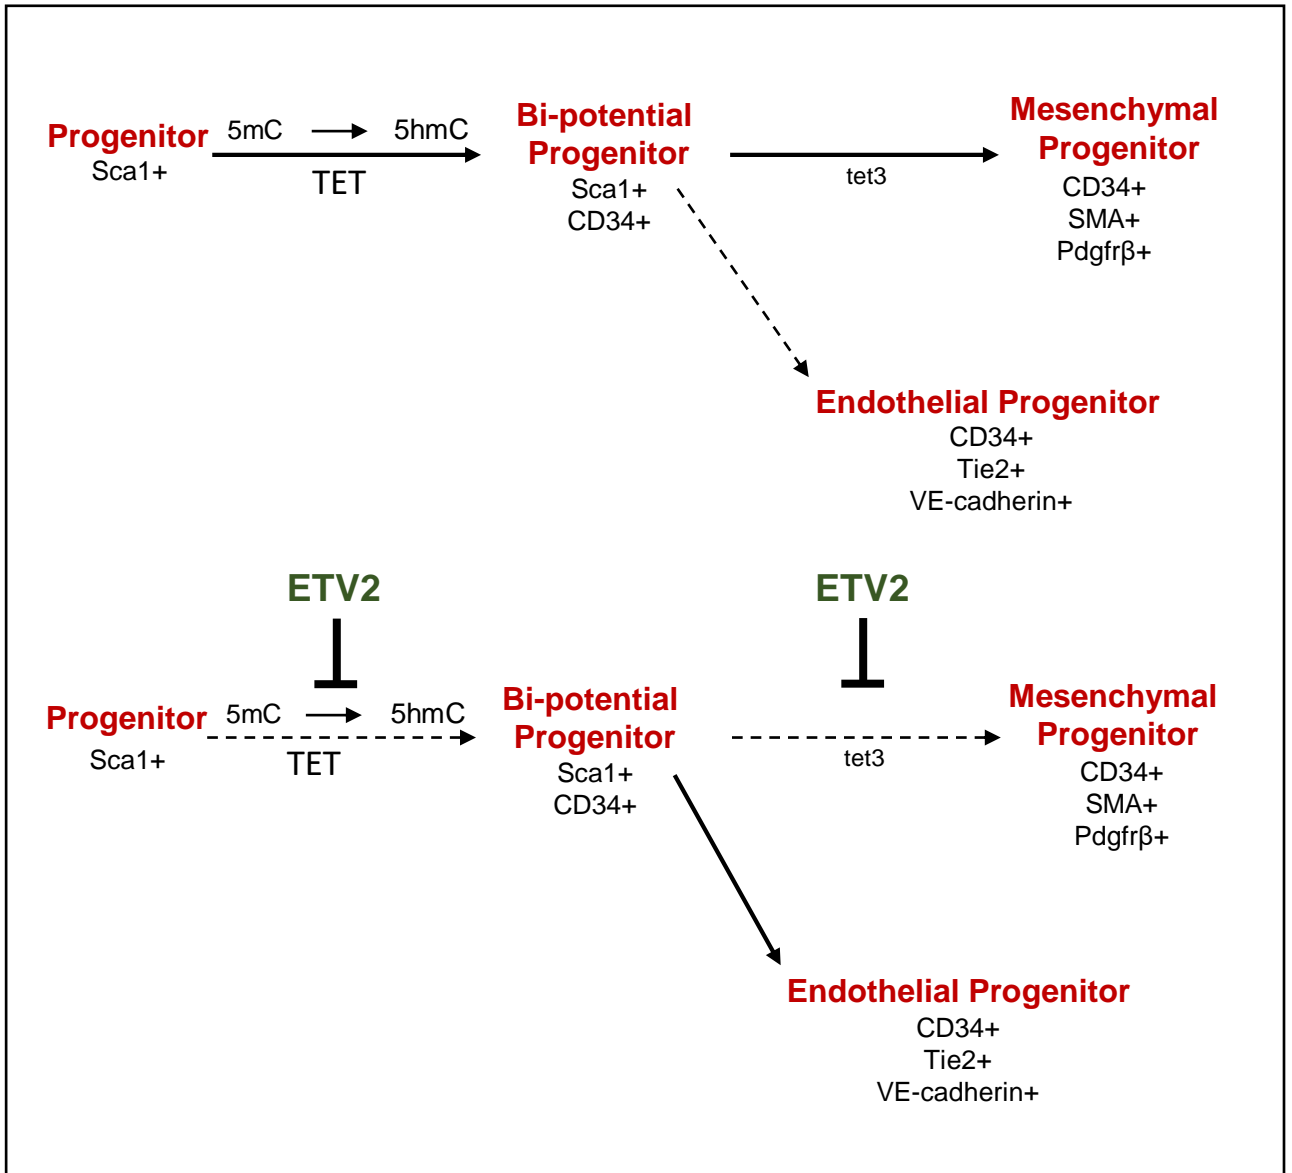

**Figure XI. Schematic of AdvSca1 cells differentiation and ETV2 reprogramming model.** When placed in differentiation conditions, AdvSca1 cells escape a multipotent progenitor state for a Sca1+ cd34+ bipotent progenitor state through DNA hydroxymethylation. ETV2 overexpression decreases the expression of *tet3*, preventing further DNA hydroxymethylation of SMC/mesenchymal genes and reducing their expression, therefore forcing the differentiation AdvSca1 cells towards the endothelial fate.
