# Supplementary figures and images for: Adventitial Sca1+ Cells Transduced With ETV2 Are Committed to the Endothelial Fate and Improve Vascular Remodeling After Injury
Source: PubMed Central journal article supplement — Arterioscler Thromb Vasc Biol. 2017 Dec 27;38(1):232–44. doi: 10.1161/ATVBAHA.117.309853 (PMC5757665; doi:10.1161/atvbaha.117.309853), 2017-12-27

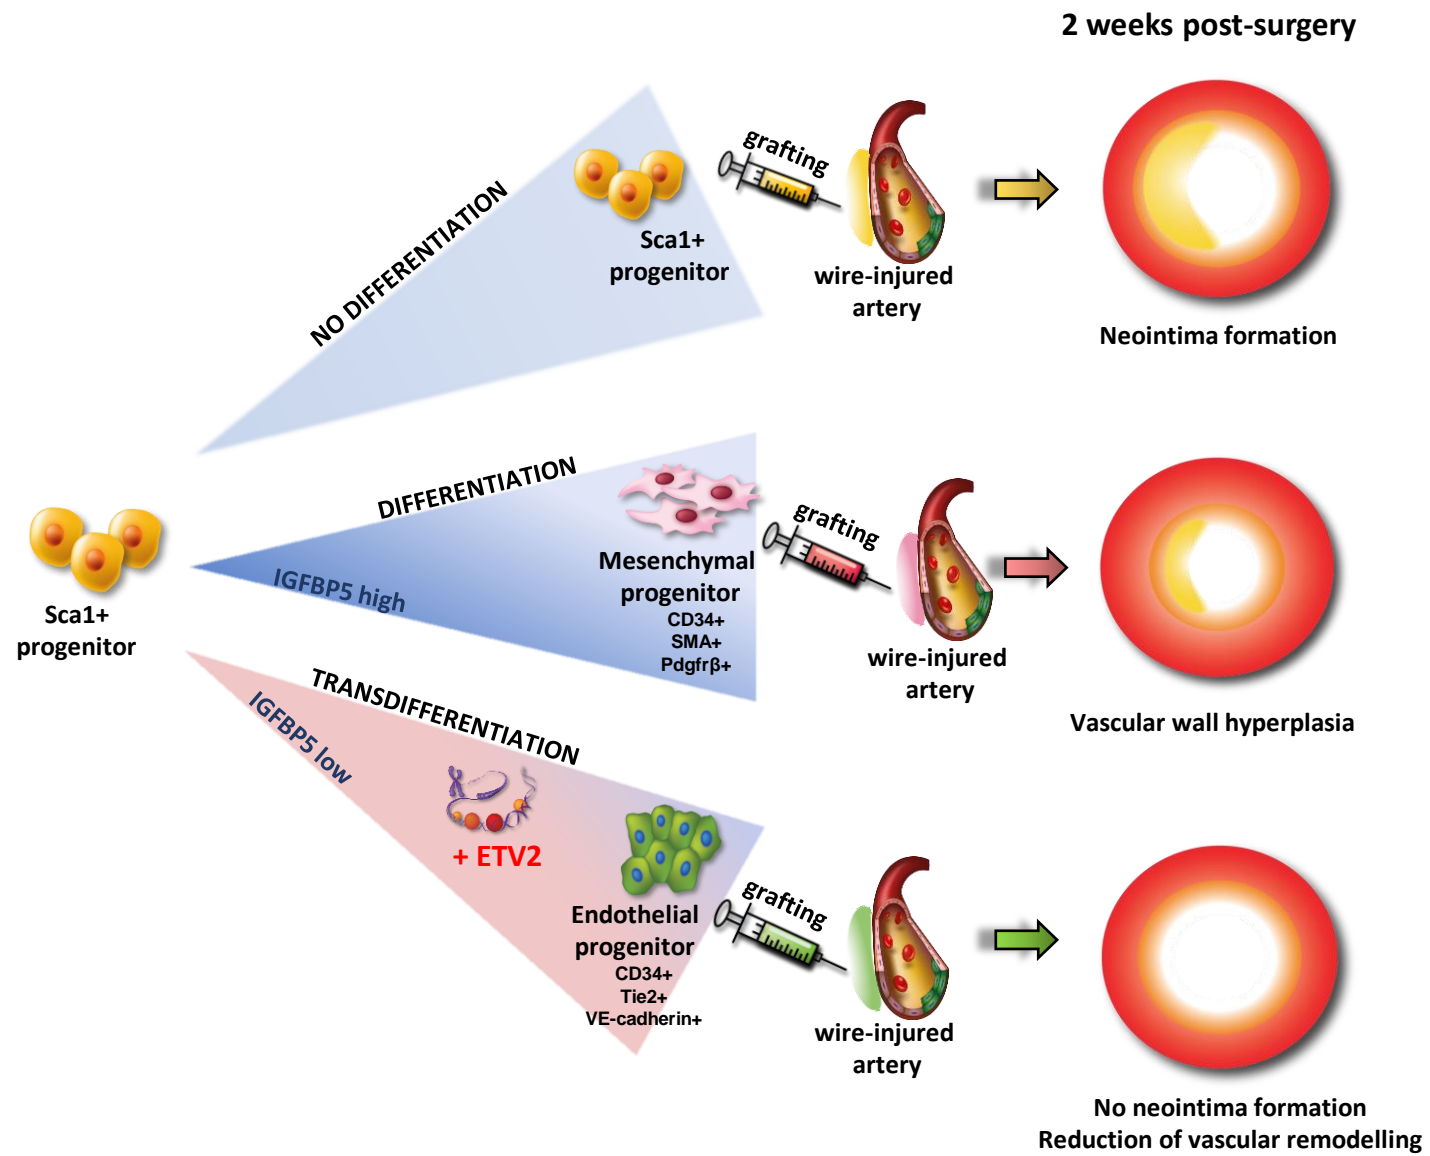

Supplement: atv-38-232-s003.pdf [file atv-38-232-s003.pdf]
